# Supplementary material for: Cellulose nanocrystals for crop protection: leaf adhesion and controlled delivery of bioactive molecules
Source: Royal Society of Chemistry journal article supplement (doi:10.1039/d3gc00328k), 2023-01-01
Supplement: d3gc00328k1.pdf [file d3gc00328k1.pdf]

Supporting Information

## **Cellulose nanocrystals for crop protection: leaf adhesion and controlled delivery of bioactive molecules**

*Like Ning<sup>1,2</sup>, Chaoqun You<sup>1\*</sup>, Yuxin Jia<sup>1</sup>, Jingqian Chen<sup>2</sup>, Yu Zhang<sup>1</sup>, Xun Li<sup>1</sup>, Orlando J. Rojas<sup>2\*</sup>, Fei Wang<sup>1\*</sup>*

<sup>1</sup> College of Chemical Engineering, Nanjing Forestry University; Jiangsu Key Lab for the Chemistry and Utilization of Agro-Forest Biomass; Jiangsu Co-Innovation Centre of Efficient Processing and Utilization of Forest Resources, Nanjing 210037, PR China.

<sup>2</sup> Bioproducts Institute, Department of Chemical and Biological Engineering, Department of Chemistry and Department of Wood Science, University of British Columbia, 2360, East Mall, Vancouver, BC V6T 1Z3, Canada.

Corresponding authors: FW, hgwf@njfu.edu.cn; OJR, orlando.rojas@ubc.ca and CY, chemyoucq@njfu.edu.cn.

Number of pages: 7

Tables: 4

Figures: 9

**Table S1** Formulation of all tested samples.

| Samples                | Composition |          |             |    |
|------------------------|-------------|----------|-------------|----|
|                        | XCM         | CNC-COOH | $\beta$ -CD | TA |
| CNCs                   |             |          |             |    |
| CNC-COOH               |             | √        |             |    |
| $\beta$ CNC            |             | √        | √           |    |
| XCM@ $\beta$ CNC       | √           | √        | √           |    |
| TA/Cu@ $\beta$ CNC     |             | √        | √           | √  |
| TA/Cu-XCM@CNC          | √           | √        |             | √  |
| TA/Cu-XCM@ $\beta$ CNC | √           | √        | √           | √  |

**Table S2** Pesticide loading efficiency (LE) of XCM@ $\beta$ CNC, TA/Cu-XCM@ $\beta$ CNC.

|        | XCM@ $\beta$ CNC | TA/Cu-XCM@ $\beta$ CNC |
|--------|------------------|------------------------|
| LE (%) | 4.77±0.03        | 9.04±0.02              |

**Table S3** The hydrodynamic diameter of CNC,  $\beta$ CNC, XCM@ $\beta$ CNC, and TA/Cu-XCM@ $\beta$ CNC.

| Sample                                 | Hydrodynamic diameter (nm) |
|----------------------------------------|----------------------------|
| CNCs                                   | 156                        |
| $\beta$ CNC                            | 181                        |
| XCM@ $\beta$ CNC                       | 322                        |
| <b>TA/Cu-XCM@<math>\beta</math>CNC</b> | <b>242</b>                 |

The release kinetics of TA/Cu-XCM@ $\beta$ CNC was analyzed using Zero-order, First-order, Higuchi, Bhaskar, and Ritger Peppas models in Eq. (1), (2), (3), (4), (5):

$$\text{Zero-order model: } M_t/M_\infty = a + kt. \quad (1)$$

$$\text{First-order model: } M_t/M_\infty = a(1 - e^{-kt}). \quad (2)$$

$$\text{Higuchi model: } M_t/M_\infty = kt^{1/2}. \quad (3)$$

$$\text{Bhaskar model: } M_t/M_\infty = a(1 - e^{-kt^{0.65}}). \quad (4)$$

$$\text{Ritger-Peppas model: } M_t/M_\infty = kt^n. \quad (5)$$

where  $M_t/M_\infty$  is the accumulative release ratio (%) of XCM at time  $t$ ,  $a$  is the initial concentration,  $k$  is the kinetic constant and  $n$  is the diffusion exponent.

$n$  is an index which reflects release mechanism: Fickian diffusion ( $n < 0.43$ ), non-Fickian or anomalous diffusion ( $0.43 < n < 0.85$ ), and case II transport ( $n > 0.85$ )<sup>1</sup>.

**Table S4** Fitting results for XCM release curves of TA/Cu-XCM@ $\beta$ CNC at different pH values.

| Fitting model | pH 6                               |                | pH 7                               |                | pH 8                               |                |
|---------------|------------------------------------|----------------|------------------------------------|----------------|------------------------------------|----------------|
|               | kinetic equation                   | R <sup>2</sup> | kinetic equation                   | R <sup>2</sup> | kinetic equation                   | R <sup>2</sup> |
| Zero-order    | $y = 32.82 + 1.50x$                | 0.6089         | $y = 17.17 + 1.36x$                | 0.8168         | $y = 15.44 + 1.56x$                | 0.8726         |
| First-order   | $y = 59.23(1 - e^{-0.91x})$        | 0.9003         | $y = 45.36(1 - e^{-0.24x})$        | 0.8602         | $y = 50.48(1 - e^{-0.16x})$        | 0.9010         |
| Higuchi       | $y = 15.31 x^{1/2}$                | 0.4966         | $y = 10.49 x^{1/2}$                | 0.8750         | $y = 10.88 x^{1/2}$                | 0.9502         |
| Bhaskar       | $y = 62.45(1 - e^{-0.73x^{0.65}})$ | 0.9468         | $y = 50.90(1 - e^{-0.32x^{0.65}})$ | 0.9506         | $y = 60.70(1 - e^{-0.22x^{0.65}})$ | 0.9688         |
| Ritger-Peppas | $y = 37.51 x^{0.18}$               | 0.9960         | $y = 18.37 x^{0.30}$               | 0.9918         | $y = 15.98 x^{0.36}$               | 0.9937         |

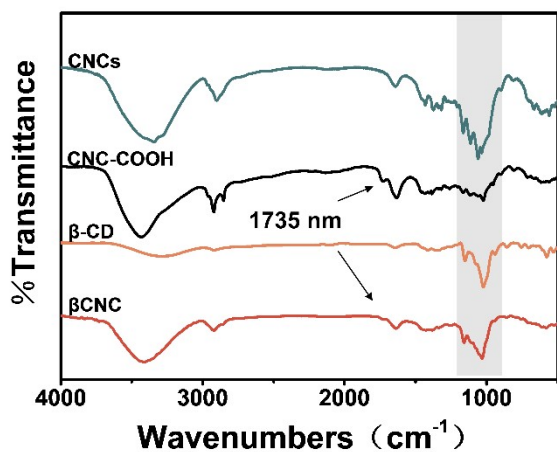

Figure S1 FTIR spectra of CNCs, CNC-COOH,  $\beta$ -CD and  $\beta$ CNC.

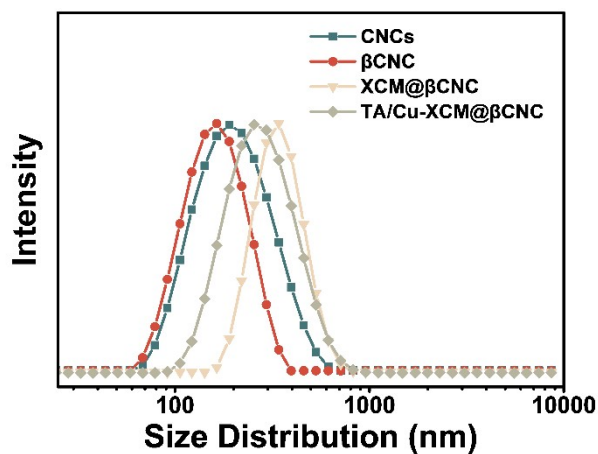

Figure S2 Size distribution of CNCs,  $\beta$ CNC, XCM@ $\beta$ CNC and TA/Cu-XCM@ $\beta$ CNC.

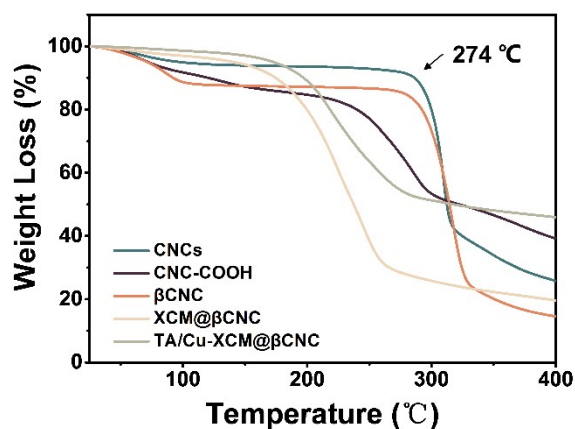

Figure S3 TGA curves of dried CNCs, CNC-COOH,  $\beta$ CNC, XCM@ $\beta$ CNC and TA/Cu-XCM@ $\beta$ CNC.

For the deposition properties of pesticide carriers on superhydrophobic surfaces, silanized glass slides were selected to simulate the leaves. One slide was placed horizontally and the other slide was fixed at a slope of 45<sup>o</sup>. Then, the formulations were sprayed on the siliconized glass slides with identical volumes. The deposition ratio (DR, %) was calculated using Eq. (6):

$$DR (\%) = \frac{w_i}{w_h} \times 100\% \quad (6)$$

where  $w_i$  was the additional weight of the inclined slide;  $w_h$  was the additional weight of the horizontal slide. Each test was measured in six replicates.

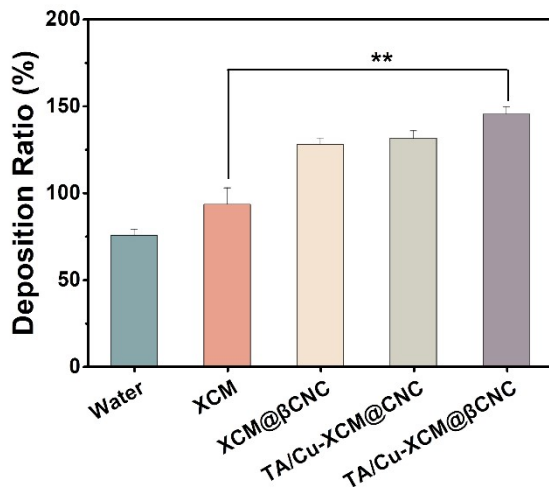

**Figure S4** Deposition profile of water, XCM, XCM@βCNC, TA/Cu-XCM@CNC and TA/Cu-XCM@βCNC on glass.

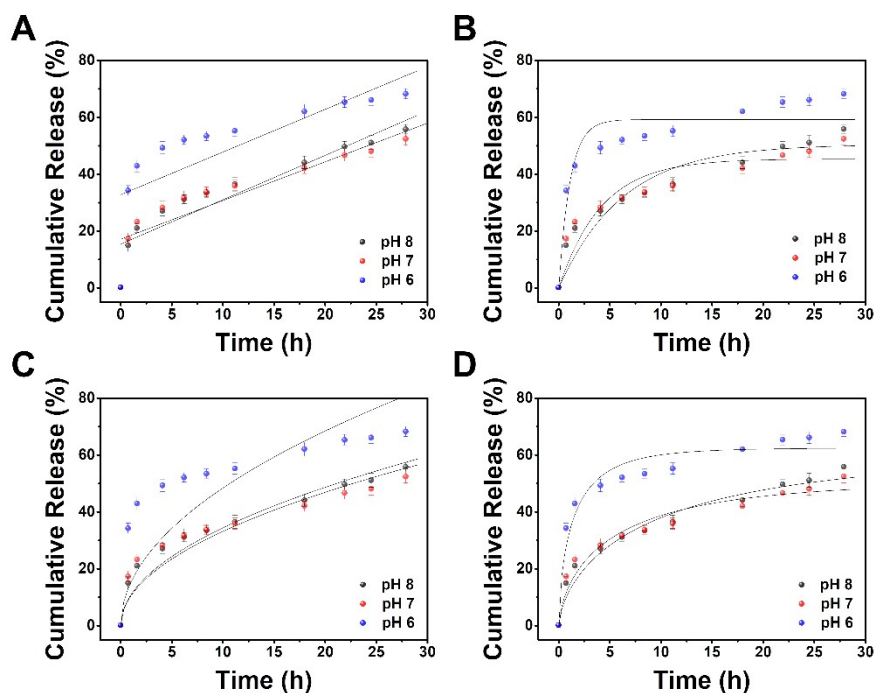

**Figure S5** Fitting profiles of the XCM time-dependent release from TA/Cu-XCM@ $\beta$ CNC using the Zero-order, First-order, Higuchi, and Bhaskar models, respectively.

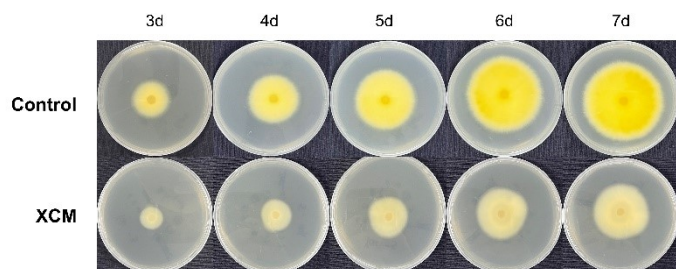

**Figure S6** Digital photos of *R. solani* that incubated with XCM solution.

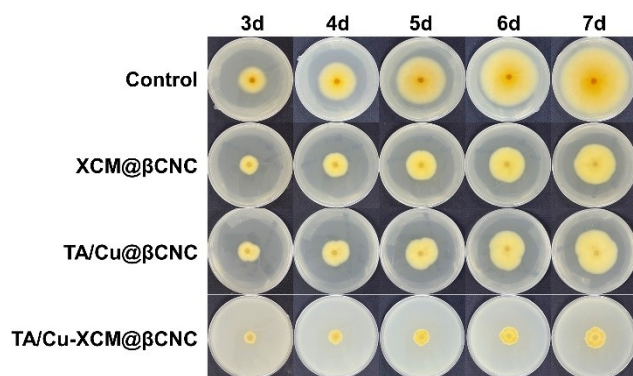

**Figure S7** Digital photos of *C. capsica* that incubated with XCM@ $\beta$ CNC, TA/Cu@ $\beta$ CNC and TA/Cu-XCM@ $\beta$ CNC.

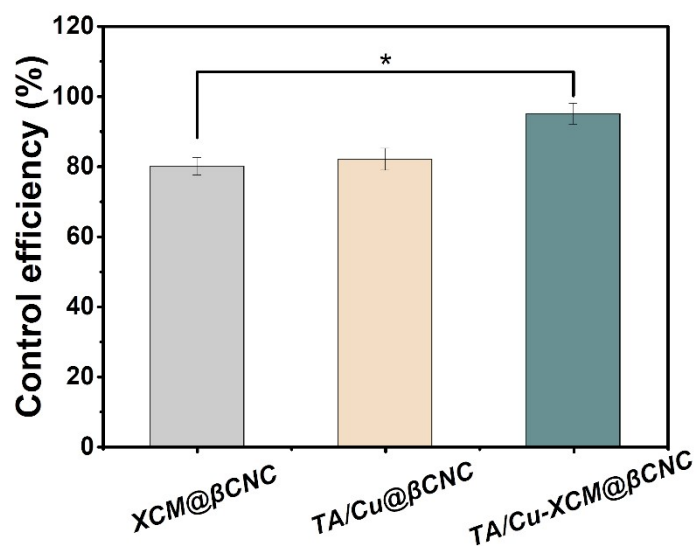

**Figure S8** Control efficiency of different suspensions against *R. solani* on pepper plants.

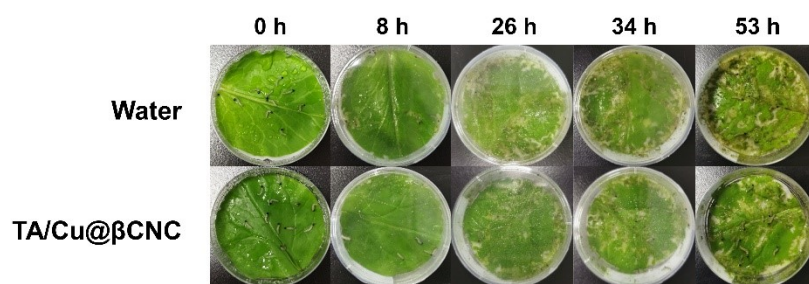

**Figure S9** Digital photos to assess the insecticidal activity of water and TA/Cu@βCNC.

## REFERENCES

- 1 G. Teng, C. Chen, N. Jing, C. Chen, Y. Duan, L. Zhang, Z. Wu and J. Zhang, *Chem. Eng. J.*, 2023, **451**, 139052.
- 2 Y. Zhang, B. Y. Liu, K. X. Huang, S. Y. Wang, R. L. Quirino, Z. X. Zhang and C. Q. Zhang, *ACS Appl. Mater. Inter.*, 2020, **12**, 37607-37618.
